# Supplementary material
Source: PubMed Central journal article supplement (PMC3799328)
Supplement: 1315320110_pnas.201315320SI.pdf [file 1315320110_pnas.201315320SI.pdf]

# Supporting Information

Guckes et al. 10.1073/pnas.1315320110

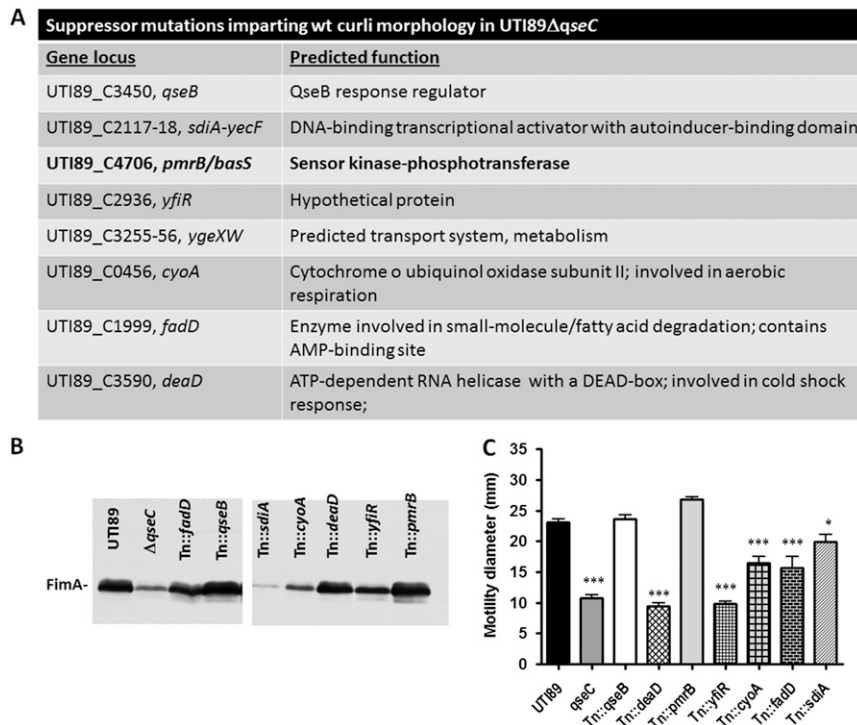

**Fig. S1.** Random mutagenesis screening identifies suppressors of the *qseC* deletion phenotype. (A) Table depicting factors the disruption of which restored wild-type (WT) curli morphology in the *qseC* deletion mutant. Transposon mutagenesis was performed as described in (1). (B) Western blot probing for FimA protein abundance in suppressor mutants shown in A. A representative of two experiments is shown. (C) Bar graph depicting average motility diameters (in mm) of each suppressor mutant compared with WT UTI89 and UTI89 $\Delta$ qseC after 7 h of growth in soft LB-agar (0.25%). Average motility diameters were calculated using data from three independent experiments. Statistics were performed using unpaired, two-tailed Student *t* test. \* $P \leq 0.01$ , \*\*\* $P < 0.0001$ .

1. Hadjifrangiskou M, et al. (2012) Transposon mutagenesis identifies uropathogenic *Escherichia coli* biofilm factors. *J Bacteriol* 194(22):6195–6205.



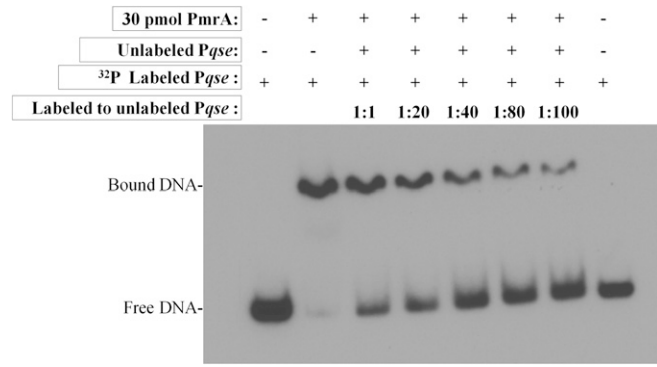

**Fig. S4.** PmrA regulates *qseBC* expression. Depiction of competition assays using increasing concentrations of unlabeled *qseBC* promoter DNA to validate specificity of interaction. A representative of four independent experiments is shown.

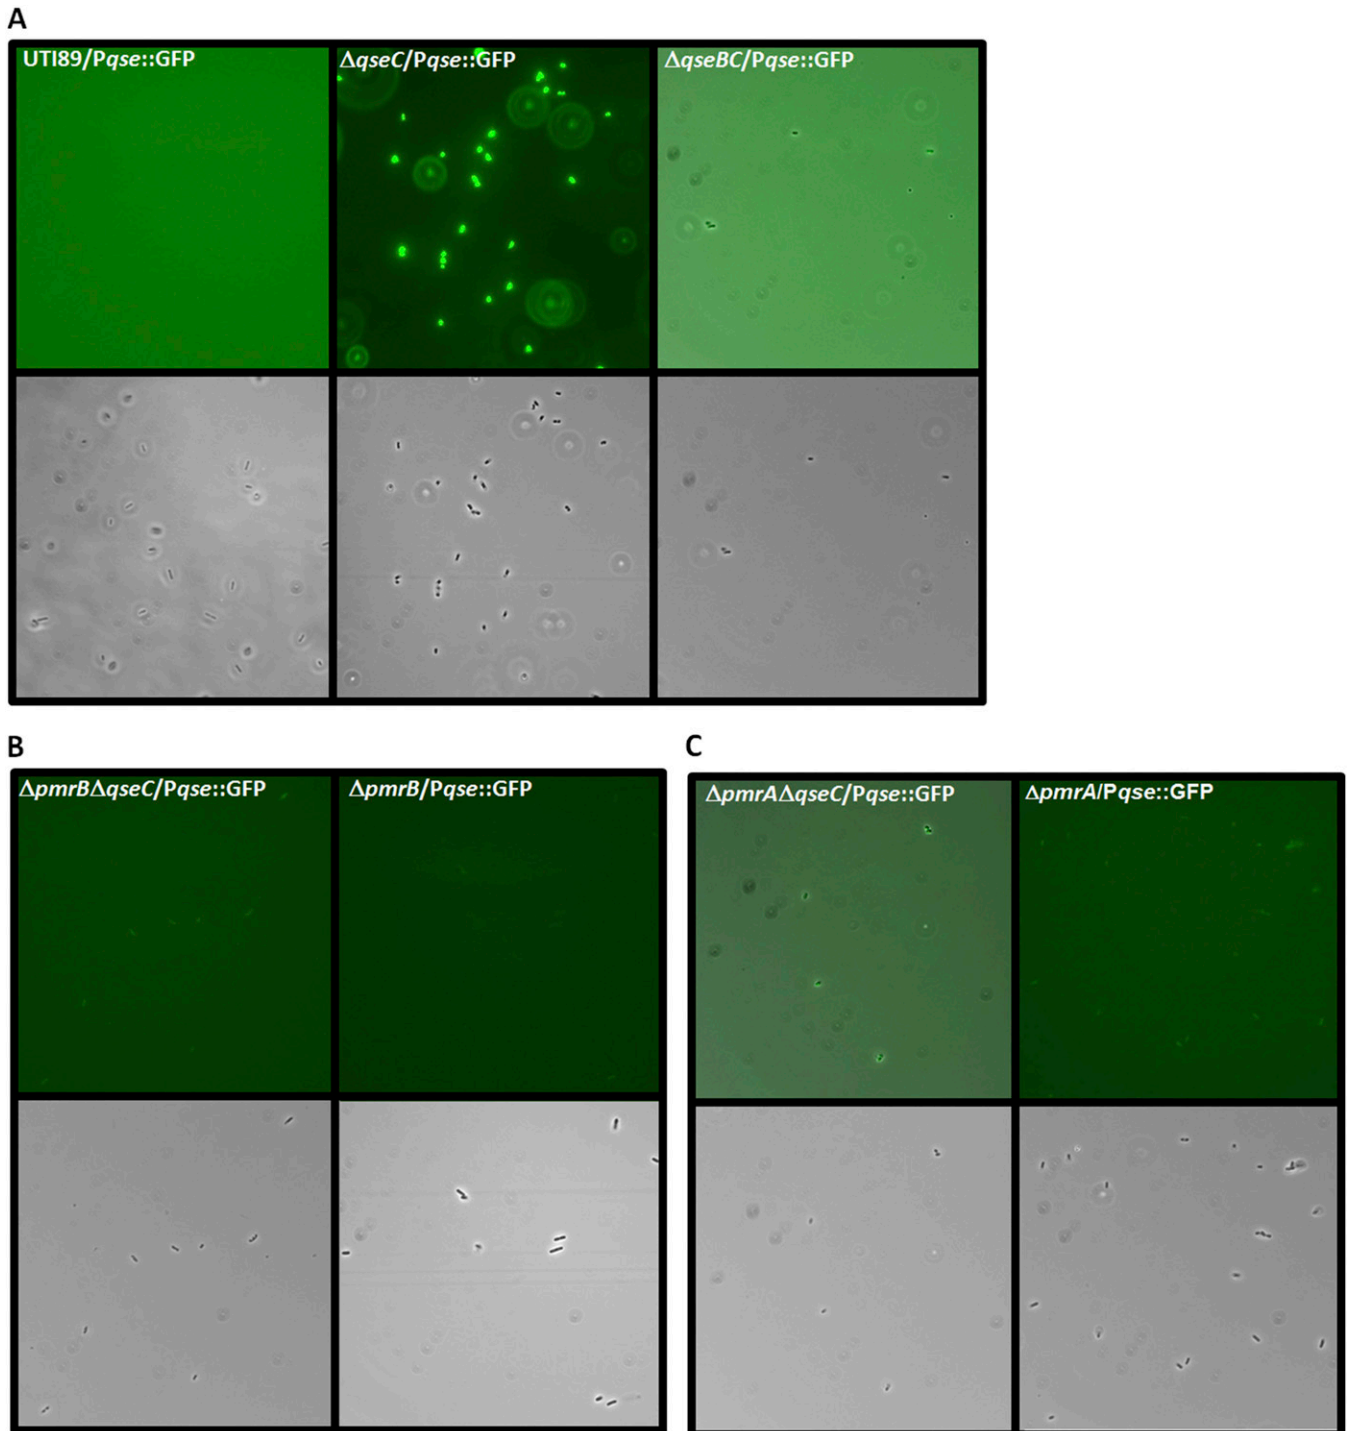

**Fig. S5.** *QseBC* up-regulation in the absence of *QseC* involves both *PmrB* and *PmrA*. Fluorescence microscopy tracking *qseBC* promoter-driven GFP expression. (A) The *qseBC* promoter is active only in the absence of *QseC*. Deletion of *pmrB* (B) or *pmrA* (C) significantly reduces *qseBC* activity in the absence of *QseC*. Duplicate slides per strain were scanned for fluorescence per experiment. Data shown are representative of three independent experiments. Images shown are representative of the bacterial populations sampled per slide. For fluorescence microscopy, bacteria were grown without shaking, in modified *N*-minimal media (5 mM KCl, 7.5 mM  $(\text{NH}_4)_2\text{SO}_4$ , 0.5 mM  $\text{K}_2\text{SO}_4$ , 1 mM  $\text{KH}_2\text{PO}_4$ , 0.1 mM Tris-HCl pH 7.4, 10 mM or 10 mM  $\text{MgCl}_2$ , 0.2% glucose, 0.1% Casamino acids, 38 mM glycerol/L) pH 7.6 and visualized using a Zeiss fluorescence microscope.



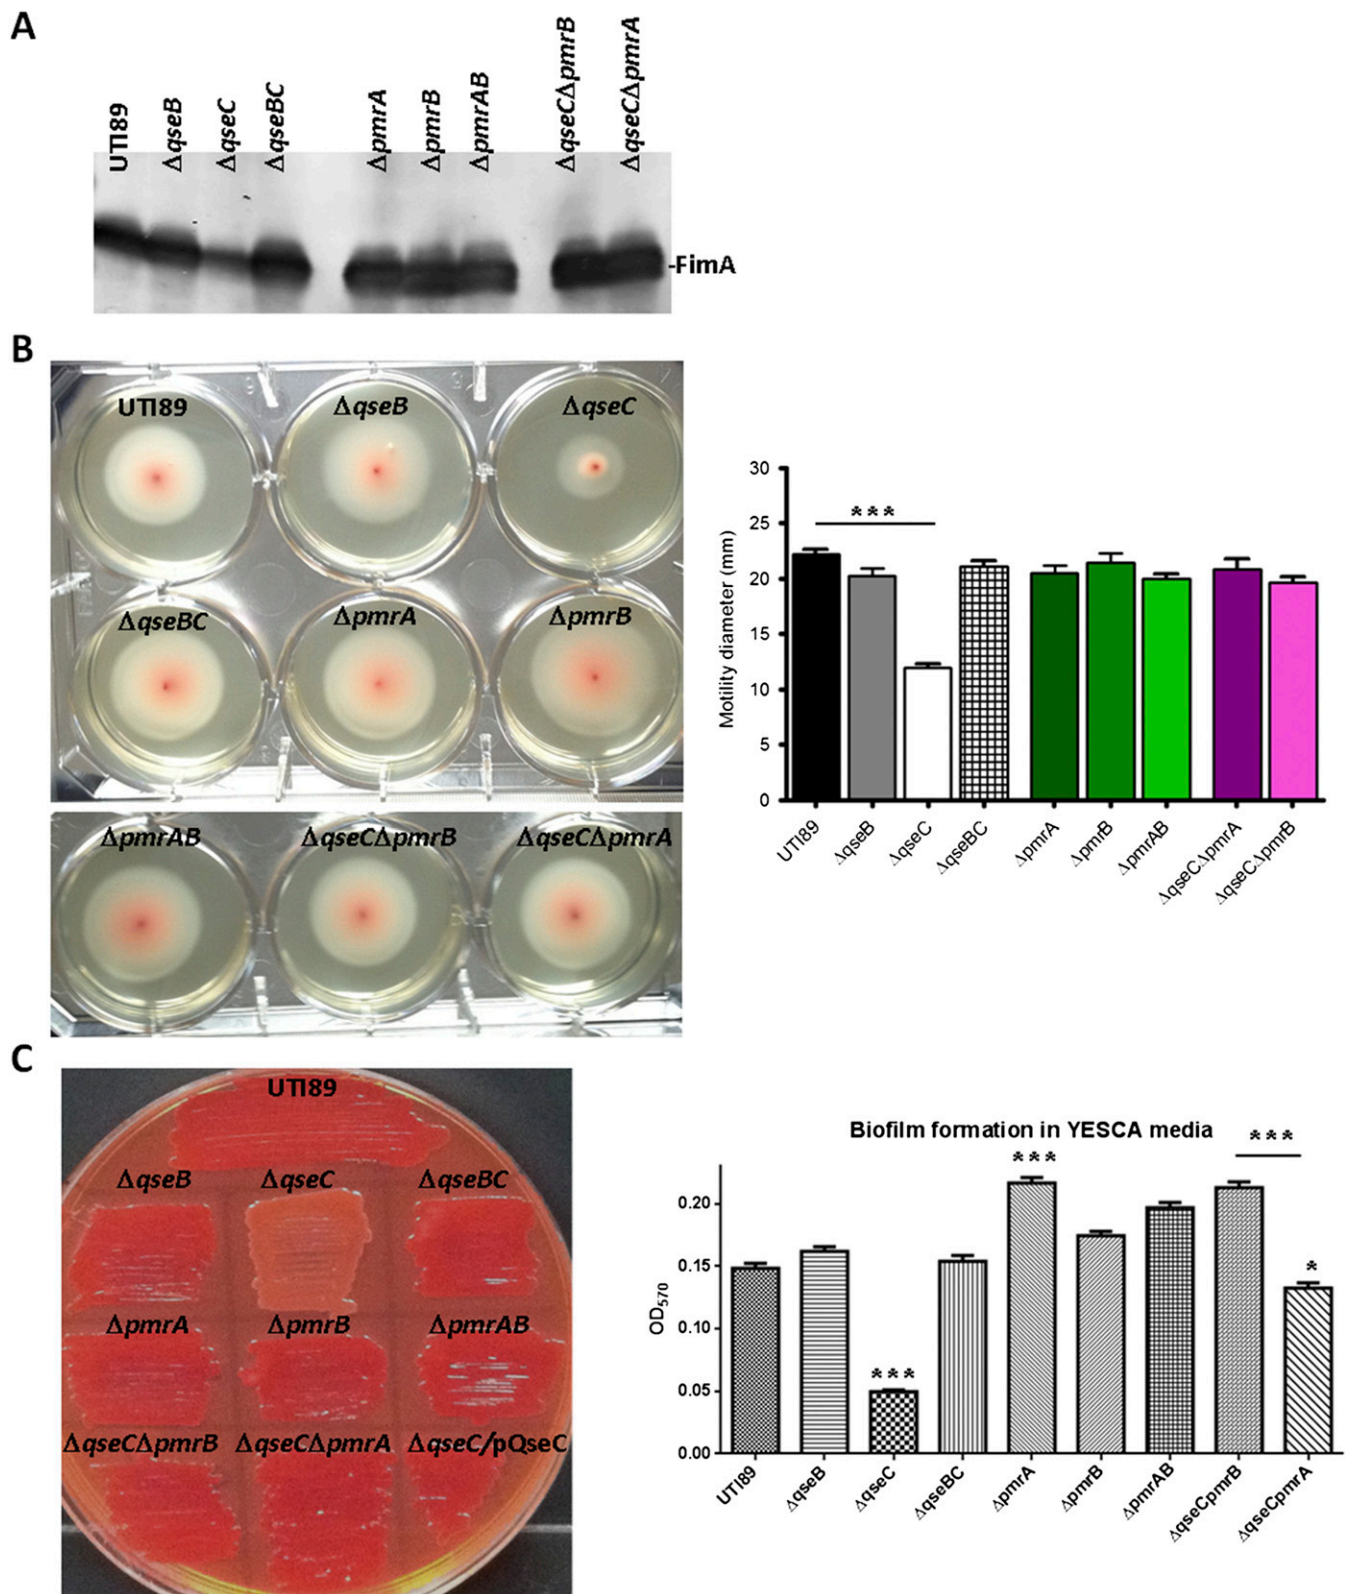

**Fig. S7.** Deletion of *pmrA* abolishes some of the *qseC* deletion defects. (A) FimA Western blot probing total cell lysates from a panel of *qse/pmr* mutants. Blot was imaged on an Odyssey infrared imaging system (Li-Cor Biosciences) in the 700-nm channel. (B) Motility phenotypes of the *qse/pmr* mutants; bacteria were inoculated into 0.25% LB agar/0.001% 2,3,5-triphenyltetrazolium chloride and incubated at 37 °C for 7 h. Experiment was repeated two times with triplicate plates/strain. \*\*\* $P \leq 0.0001$ , determined by two-tailed unpaired Student *t* test. (C) (Left) Yeast Extract/Casamino Acid (YESCA) agar plate supplemented with Congo Red (CR) dye serving as a proxy for curli fiber expression. Curli positive bacteria appear bright red on these media, while curli-negative bacteria appear white and smooth. (Right) Biofilm formation after 48 h in YESCA media. Quantitation of biomass was performed using the colorimetric method of O’Toole (1).

Legend continued on following page

Experiment was repeated twice with three technical replicates per biological repeat. \* $P < 0.05$ , \*\*\* $P \leq 0.0001$ , as determined by two-tailed unpaired Student  $t$  test. Asterisks directly above bars depicting significance compared with WT UT189.

1. Hadjifrangiskou M, et al. (2012) Transposon mutagenesis identifies uropathogenic *Escherichia coli* biofilm factors. *J Bacteriol* 194(22):6195–6205.

**Table S1. PmrA targets affected in the absence of QseC**

| Gene name   | Locus       | Fold-change in UT189 $\Delta$ qseC (1) | PmrA-mediated fold-change in <i>Salmonella</i> (2) | Predicted function                                  |
|-------------|-------------|----------------------------------------|----------------------------------------------------|-----------------------------------------------------|
| <i>yijP</i> | UT189_C4546 | 7.1                                    | 3.2                                                | Hypothetical                                        |
| <i>yfbH</i> | UT189_C2538 | 2.6                                    | 2.1                                                | PgbP operon component; polymyxin B resistance       |
| <i>oppB</i> | UT189_C1442 | -2.0                                   | -2.2                                               | Oligopeptide transport permease protein             |
| <i>deoC</i> | UT189_C5152 | -2.0                                   | 2.4                                                | Enzyme; salvage of nucleosides and nucleotides      |
| <i>fadA</i> | UT189_C4430 | -2.0                                   | 2.0                                                | Enzyme; degradation of small molecules, fatty acids |
| <i>udp</i>  | UT189_C4411 | -2.3                                   | 3.2                                                | Uridine phosphorylase                               |
| <i>ybaO</i> | UT189_C0475 | -2.3                                   | 3.1                                                | Hypothetical transcriptional regulator              |

1. Hadjifrangiskou M, et al. (2011) A central metabolic circuit controlled by QseC in pathogenic *Escherichia coli*. *Mol Microbiol* 80(6):1516–1529.

2. Tamayo R, Prouty AM, Gunn JS (2005) Identification and functional analysis of *Salmonella enterica* serovar Typhimurium PmrA-regulated genes. *FEMS Immunol Med Microbiol* 43(2): 249–258.

**Table S2. Primers used in this study**

| Primer               | Sequence (5'→3')                                                            | Description                                                                                                                         |
|----------------------|-----------------------------------------------------------------------------|-------------------------------------------------------------------------------------------------------------------------------------|
| PmrB_KO_L            | TTATATCTGGTTTGCCACGTA CTGATCTTTTTTCAGCCGTA<br>TCCAGGCCCGTGTAGGCTGGAGCTGCTTC | 50 bp at +4605923 with <u>pKD4 left priming site</u> to knock out UT189_C4706 ( <i>pmrB</i> )                                       |
| PmrB_KO_R            | TGGAATCTGATGCGTTTTCTGCGCCGACCAATATCG<br>CTGCGCCAACGGCTCATATGAATATCCTCCTTAG  | 50 bp at -4607023 with <u>pKD4 right priming site</u> to knock out UT189_C4706 ( <i>pmrB</i> )                                      |
| Test_PmrB_KOL        | GTGTTTCAGCGTGTGGTGGT                                                        | Left primer to verify <i>pmrB</i> deletion; anneals at +4605891                                                                     |
| Test_PmrB_KOR        | TGTCGCGCCTGATGCTTAAA                                                        | Right primer to verify <i>pmrB</i> deletion; anneals at -4607220                                                                    |
| PmrA_KO_L            | TTAGTTTTCTCATTTGCGACCAGCATATAGCCA<br>AATCCGCGCACGGTGCCTGTAGGCTGGAGCTGCTTC   | 50 bp at +4607024 with <u>pKD4 left priming site</u> to knock out UT189_C4707 ( <i>pmrA</i> )                                       |
| PmrA_KO_R            | ATGAAAATCTGATTTGTTGAAGACGATACGCTGT<br>TATTGCAGGGATTGATCATATGAATATCCTCCTTAG  | 50 bp at -4607692 with <u>pKD4 right priming site</u> to knock out UT189_C4707 ( <i>pmrA</i> )                                      |
| Test_PmrA_KOR        | CCTGACTGGCGTTGAGACGA                                                        | Right primer to verify <i>pmrA</i> deletion; anneals at -4607764                                                                    |
| Ppmr_BamHI_F         | CGGGATCCACTATCGGCAGCCACG                                                    | Left primer to amplify and clone <i>pmrAB</i> promoter in pTRC99A; <u>BamH I</u> site is underlined                                 |
| Ppmr_SmaI_R          | TCCCCCGGGTTCACTCACTCTCCTGCA                                                 | Right primer to amplify and clone <i>pmrAB</i> promoter in pTRC99A; <u>Sma I</u> site is underlined                                 |
| <i>pmrB</i> _SmaI_F  | TCCCCCGGGTTGAATCTGATGCGTTTTTC                                               | Left primer to amplify and clone <i>pmrB</i> in pTRC99A, downstream of the <i>pmrAB</i> promoter; <u>Sma I</u> site is underlined   |
| <i>pmrB</i> _EcoRI_R | CGGAATTCCTTATATCTGGTTTGCCACGTAC                                             | Right primer to amplify and clone <i>pmrB</i> in pTRC99A, downstream of the <i>pmrAB</i> promoter; <u>EcoR I</u> site is underlined |
| PmrB_H155A_F         | GTTGTTTACCGCTGACGTCGCGCCGAACTGCGAACGCCACTGG                                 | Left primer to introduce an H→A mutation in PmrB. H encoding CAC was changed to GCC (underlined)                                    |
| PmrB_H155A_R         | CCAGTGCGCTTCGAGTTCGGCCG CGACGTCAGCGGTAACAAC                                 | Reverse anti-parallel primer complementary to PmrB_H155A_F. Mutated codon underlined                                                |
| PmrB_mycHis_F        | CATGCCATGGCCAATCTGATGCGTTTTCTGC                                             | Left primer to amplify and clone <i>pmrB</i> and <i>pmrB</i> _H155A in pBAD-mycHis A, <u>Nco I</u> site is underlined               |
| PmrB_mycHis_R        | CCCAAGCTTTTATATCTGGTTTGCCACG                                                | Right primer to amplify and clone <i>pmrB</i> and <i>pmrB</i> _H155A in pBAD-mycHis A, <u>Hind III</u> site is underlined           |
